# Supplementary material for: Biomass carbon dots derived fromWedelia trilobatafor the direct detection of glutathione and their imaging application in living cells
Source: Royal Society of Chemistry journal article supplement (doi:10.1039/d0tb02979c), 2021-01-01
Supplement: d0tb02979c1.pdf [file d0tb02979c1.pdf]

**Supplementary information**

**Biomass carbon dots derived from *wedelia trilobata* for the direct detection of glutathione and their imaging application in living cells**

Caizhen Liang<sup>a</sup>, Xiaobao Xie<sup>\*a</sup>, Dandan Zhang<sup>a</sup>, Jin Feng<sup>a</sup>, Shunying Lu<sup>a</sup>, Qingshan Shi<sup>\*a</sup>

<sup>a</sup> *Guangdong Provincial Key laboratory of Microbial Culture Collection and Application, State Key Laboratory of Applied Microbiology Southern China, Guangdong Institute of Microbiology, Guangdong Academy of Sciences, Guangzhou 510070, R.P.China*

\*Corresponding author

Email Address: xiexb@gdim.cn (Xiaobao Xie); shiqingshan@hotmail.com (Qingshan Shi).

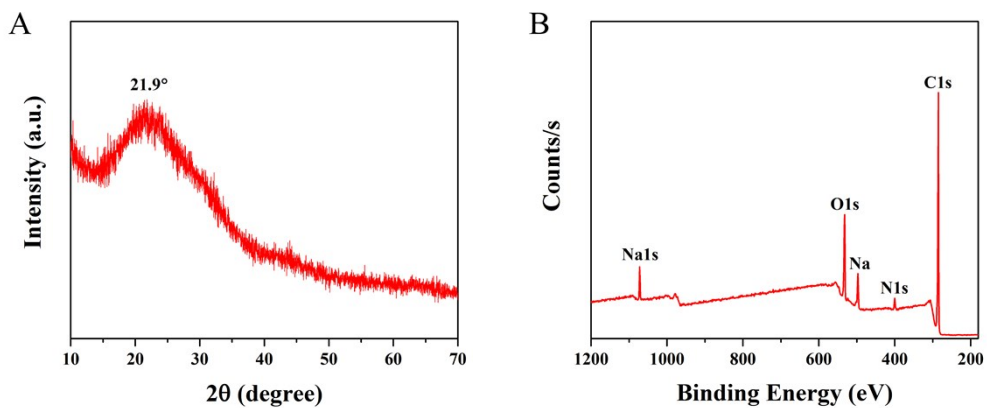

**Fig. S1.** (A) XRD spectrum of wCDs; (B) Full-survey XPS of wCDs.

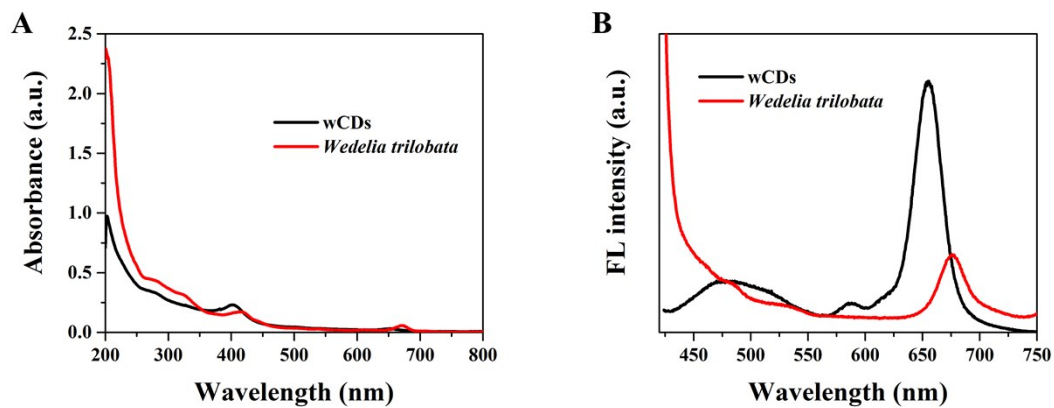

**Fig. S2** The absorption spectra (A) and fluorescence spectra (B) of wCDs and *Wedelia trilobata*.

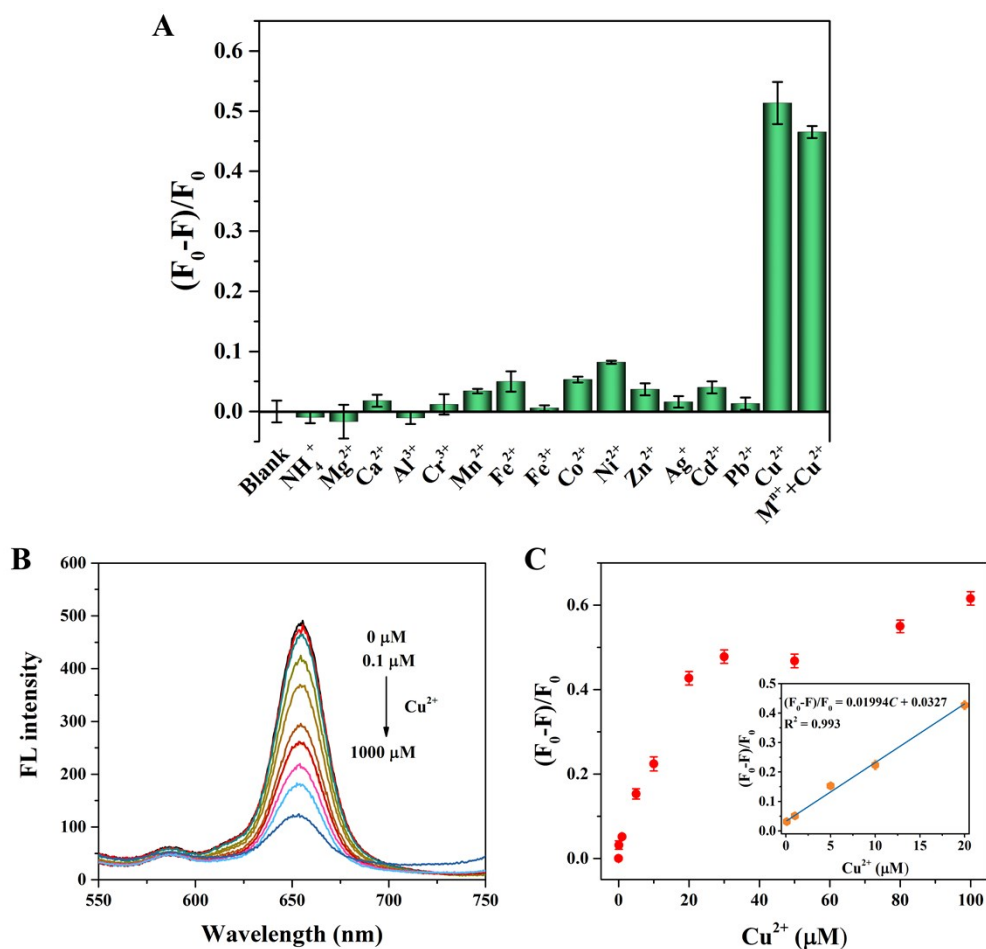

**Fig. S3** (A) Fluorescence responses of wCDs toward various cations. M<sup>n+</sup> + Cu<sup>2+</sup>: the mixed solution containing all the ions mentioned in the image; (B) Fluorescence spectra of wCDs upon addition of Cu<sup>2+</sup> at various concentrations (0–1000 μM) in mimic physiological environment (PBS containing 1 mM Mg<sup>2+</sup>, 1 mM Ca<sup>2+</sup>, and 50 μM of Mn<sup>2+</sup>, Zn<sup>2+</sup>, Fe<sup>2+</sup>). (C) The dependence of (F<sub>0</sub>-F)/F<sub>0</sub> on the Cu<sup>2+</sup> concentrations. Inset: linearity of response.

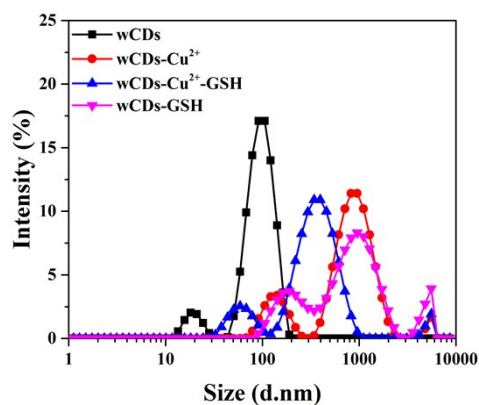

**Fig. S4.** Size distribution of the wCDs, wCDs-Cu<sup>2+</sup>, wCDs-Cu<sup>2+</sup>-GSH, and wCDs-GSH in PBS.

**Table S1** Hydrodynamic diameters of the wCDs, wCDs-Cu<sup>2+</sup>, wCDs-Cu<sup>2+</sup>-GSH, and wCDs-GSH dispersions

| Sample                     | Size (d. nm) |
|----------------------------|--------------|
| wCDs                       | 150.50       |
| wCDs-Cu <sup>2+</sup>      | 495.93       |
| wCDs-Cu <sup>2+</sup> -GSH | 256.57       |
| wCDs-GSH                   | 545.77       |

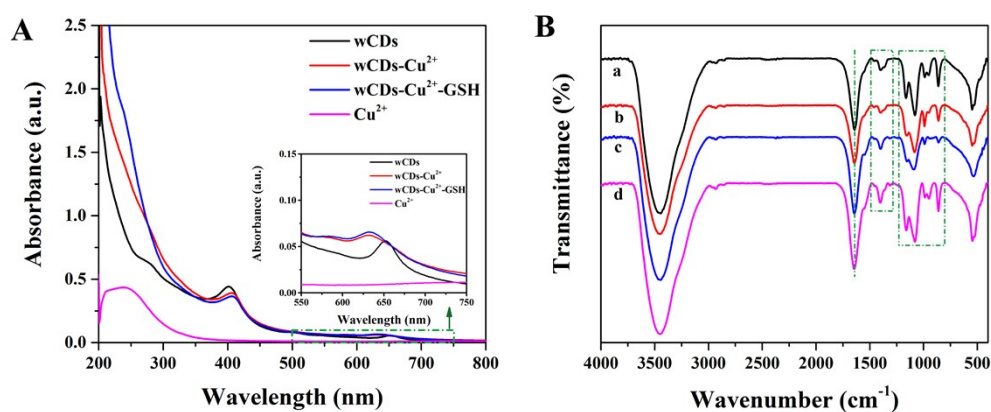

**Fig. S5.** (A) UV-vis absorption spectra of wCDs, wCDs-Cu<sup>2+</sup>, wCDs-Cu<sup>2+</sup>-GSH and Cu<sup>2+</sup> solutions (Cu<sup>2+</sup>, GSH: 200  $\mu$ M); (B) FTIR spectra of (a) wCDs, (b) wCDs-Cu<sup>2+</sup>, (c) wCDs-Cu<sup>2+</sup>-GSH, and (d) wCDs-GSH.

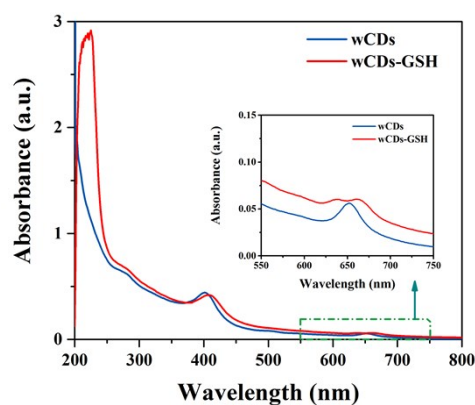

**Fig. S6.** UV-vis absorption spectra before and after addition of GSH into the wCDs dispersion.

**Table S2** Comparison of sensing performance of different CDs-based fluorescence probes for GSH detection

| CDs-based probe                    | CDs precursors                                                   | Linear range ( $\mu\text{M}$ ) | Incubation time | Detection modes                  | Ref.      |
|------------------------------------|------------------------------------------------------------------|--------------------------------|-----------------|----------------------------------|-----------|
| CQDs/AuNPs                         | Citric acid, 2,2'-(Ethylene-dioxy)bis(ethylamine)                | 0.1–0.6                        | 5 min           | Turn off-on                      | 1         |
| C-dots–MnO <sub>2</sub>            | Citric acid ethanediamine                                        | 1–10                           | 3 min           | Turn off-on                      | 2         |
| CNDs/AsO <sub>2</sub> <sup>-</sup> | Trisodium citrate sodium thiosulphate                            | 10–100                         | 15 min          | turn off;                        | 3         |
| CDs-Br                             | Citric acid DETA                                                 | 0–34                           | 30 min          | Bromide-modification, Turn on    | 4         |
| N,S-CDs/AuNPs                      | 3-aminothiophenol                                                | 3.8–415.1                      | 20 min          | Turn off-on                      | 5         |
| CQDs/OPD/Cu <sup>2+</sup>          | Phenylenediamine Citric acid                                     | 30–80                          | > 3 h           | Turn off-on                      | 6         |
| N-CDs/Ag <sup>+</sup>              | Neutral red Triethylamine                                        | 10–100                         | -               | Sequential detection             | 7         |
| B-CQDs/CC                          | Citric Acid, NaTPB, borax, boric acid                            | 0.002–0.1                      | 30 min          | Turn off-on                      | 8         |
| BPMA-CQDs/Cu(II);                  | Carbon powder, H <sub>2</sub> SO <sub>4</sub> , HNO <sub>3</sub> | 0.14–13.3;                     | 16 min          | Turn off-on;                     | 9         |
| BPMA-CQDs/Ag(I)                    |                                                                  | 0.20–23.3                      | 14 min          | Turn off-on                      |           |
| wCDs                               | <i>Wedelia trilobata</i>                                         | 100–3000                       | 20 s            | Turn off-on and direct detection | This work |

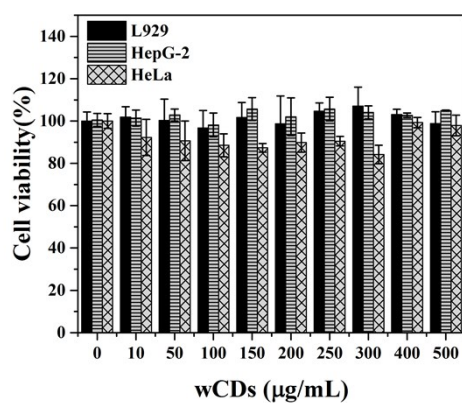

**Fig. S7.** Cytotoxicity assessment of wCDs with L929, HeLa and HepG-2 cells (mean%  $\pm$  SD, n=4).

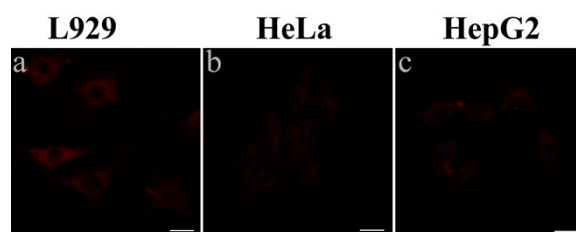

**Fig. S8.** Confocal fluorescence images of (a) L929, (b) HeLa, and (c) HepG2 cells incubated with 150 µg/mL wCDs for 4 h.  $\lambda_{ex} = 405$  nm,  $\lambda_{em} = 450-700$  nm. Scale bar: 20 µm.

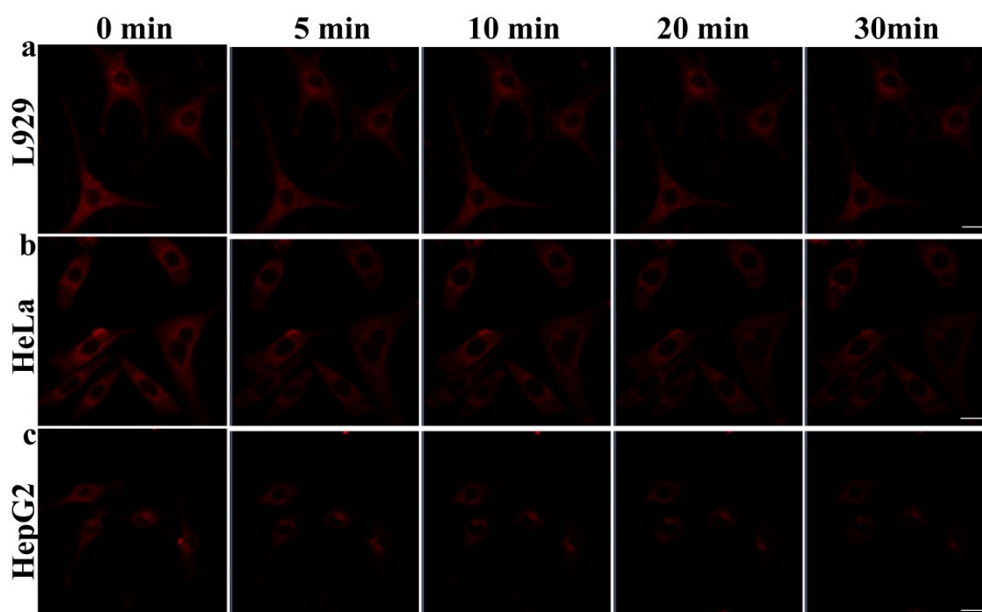

**Fig. S9.** Confocal fluorescence images of (a) L929, (b) HeLa, and (c) HepG2 cells incubated with 250 µg/mL wCDs for 4 h followed by incubation with 5 mM exogenous GSH during various periods. The fluorescence changes of these cells were monitored directly after the addition of GSH.  $\lambda_{ex} = 405$  nm,  $\lambda_{em} = 450-700$  nm. Scale bar: 20 µm.

1. Y. Shi, Y. Pan, H. Zhang, Z. Zhang, M.-J. Li, C. Yi and M. Yang, *Biosens. Bioelectron.*, 2014, **56**, 39-45.
2. Q.-Y. Cai, J. Li, J. Ge, L. Zhang, Y.-L. Hu, Z.-H. Li and L.-B. Qu, *Biosens. Bioelectron.*, 2015, **72**, 31-36.
3. A. Gupta, N. C. Verma, S. Khan and C. K. Nandi, *Biosens. Bioelectron.*, 2016, **81**, 465-472.
4. F. Yan, Q. Ye, J. Xu, J. He, L. Chen and X. Zhou, *Sens. Actuators B Chem.*, 2017, **251**, 753-762.
5. W. Dong, R. Wang, X. Gong and C. Dong, *Anal. Bioanal. Chem.*, 2019, **411**, 6687-6695.
6. Z. Han, D. Nan, H. Yang, Q. Sun, S. Pan, H. Liu and X. Hu, *Sens. Actuators B Chem.*, 2019, **298**, 126842.
7. Y. Jiao, Y. Gao, Y. Meng, W. Lu, Y. Liu, H. Han, S. Shuang, L. Li and C. Dong, *ACS Appl. Mater. Interfaces*, 2019, **11**, 16822-16829.
8. Y. Ma, A. Y. Chen, Y. Y. Huang, X. He, X. F. Xie, B. He, J. H. Yang and X. Y. Wang, *Carbon*, 2020, **162**, 234-244.
9. Y. Huang, J. Zhou, H. Feng, J. Zheng, H. M. Ma, W. Liu, C. Tang, H. Ao, M. Zhao and Z. Qian, *Biosens. Bioelectron.*, 2016, **86**, 748-755.
